# Supplementary material for: The Relationship between COVID-19 Protection Behaviors and Pandemic-Related Knowledge, Perceptions, Worry Content, and Public Trust in a Turkish Sample
Source: MDPI journal article supplement (doi:10.3390/vaccines10122027), 2022-11-27
Supplement: s1 [file s1]

# Supplementary Electronic Material 1

The questions used to probe pandemic-related emotions and worries

| Emotions                                                                                                                | Scales                                                    |
|-------------------------------------------------------------------------------------------------------------------------|-----------------------------------------------------------|
| Explanation:<br>Please choose one option per row below.<br>The novel coronavirus to me feels .....                      |                                                           |
| Close to me -----Far away from me                                                                                       | 1- Very close----- 7- Too far away                        |
| Spreading slowly -----Spreading fast                                                                                    | 1-Very slowly-----7- Very fast                            |
| Fear-inducing -----Not fear-inducing                                                                                    | 1-Not fear-inducing at all-----7- Extremely fear-inducing |
| Media hyped -----Not media hyped                                                                                        | 1-Media hyped at all-----7-Not media hyped                |
| Worrying -----Not worrying                                                                                              | 1-Not worrying at all-----7-Worrying a lot                |
| Something that makes me feel helpless -<br>Something I am able to combat                                                | 1- Something I am able to combat ---7-Extremely helpless  |
| Stressful -----Not stressful                                                                                            | 1-Not stresfull at all-----7- Extremely stresfull         |
|                                                                                                                         |                                                           |
| Worry Domain Questionnaire                                                                                              | Scales                                                    |
| Explanation:<br>Crises often involve fears and worries. Please let us know: At the moment, how much do you worry about: |                                                           |
| Losing someone I love                                                                                                   | 1- Don't worry at all --- -----7- worry a lot             |
| Health system being overloaded                                                                                          | 1- Don't worry at all --- -----7- worry a lot             |
| My own mental health                                                                                                    | 1- Don't worry at all --- -----7- worry a lot             |
| My own physical health                                                                                                  | 1- Don't worry at all --- -----7- worry a lot             |
| My loved ones' health                                                                                                   | 1- Don't worry at all --- -----7- worry a lot             |
| Restricted liberty of movement                                                                                          | 1- Don't worry at all --- -----7- worry a lot             |
| Loosing vacation opportunities                                                                                          | 1- Don't worry at all --- -----7- worry a lot             |
| Small companies running out of business                                                                                 | 1- Don't worry at all --- -----7- worry a lot             |
| Economic recession in my country                                                                                        | 1- Don't worry at all --- -----7- worry a lot             |
| Restricted access to food supplies                                                                                      | 1- Don't worry at all --- -----7- worry a lot             |
| Becoming unemployed                                                                                                     | 1- Don't worry at all --- -----7- worry a lot             |
| Not being able to pay my bills                                                                                          | 1- Don't worry at all --- -----7- worry a lot             |
| Not be able to visit people who depend on me                                                                            | 1- Don't worry at all --- -----7- worry a lot             |
